# Supplementary material for: The Odor Context Facilitates the Perception of Low-Intensity Facial Expressions of Emotion
Source: PubMed Central journal article supplement (PMC4577100; doi:10.1371/journal.pone.0138656), 2015-09-21
Supplement: pone.0138656.s003.pdf [file pone.0138656.s003.pdf]

## Intensity of expression for correct perception

| Subject | Group                 | no odor |         |           |             |         | pleasant    |             |             |             |             | aversive    |         |             |             |             |      |
|---------|-----------------------|---------|---------|-----------|-------------|---------|-------------|-------------|-------------|-------------|-------------|-------------|---------|-------------|-------------|-------------|------|
|         |                       | anger   | disgust | happiness | fear        | sadness | anger       | disgust     | happiness   | fear        | sadness     | anger       | disgust | happiness   | fear        | sadness     |      |
| 1       | without emotion names | 45      | 30      | 30        | 30          | 35      | 25          | 40          | 35          | 30          | 30          | 20          | 45      | 35          | 50          | 35          | 42,5 |
| 2       | without emotion names | 50      | 40      | 50        | 40          | 40      | 40          | 45          | 25          | 45          | 65          | 45          | 30      | 50          | 40          | 50          |      |
| 3       | without emotion names | 30      | 50      | 20        | 50          | 35      | 20          | 67,5        | 10          | 40          | 25          | 20          | 62,5    | 10          | 37,5        | 30          |      |
| 4       | without emotion names | 40      | 30      | 30        | 37,5        | 30      | 35          | 25          | 30          | 35          | 35          | 35          | 25      | 30          | 30          | 35          |      |
| 5       | without emotion names | 55      | 55      | 45        | 40          | 65      | 60          | 55          | 50          | 35          | 50          | 50          | 60      | 50          | 40          | 55          |      |
| 6       | without emotion names | 50      | 40      | 30        | 25          | 47,5    | 65          | 50          | 25          | 35          | 50          | 50          | 45      | 30          | 35          | 55          |      |
| 7       | without emotion names | 60      | 55      | 45        | 65          | 65      | 70          | 57,5        | 40          | 65          | 77,5        | 65          | 57,5    | 45          | 70          | 55          |      |
| 8       | without emotion names | 45      | 50      | 30        | 20          | 40      | 50          | 50          | 30          | 37,5        | 80          | 50          | 40      | 40          | 25          | 65          |      |
| 9       | without emotion names | 67,5    | 40      | 40        | 55          | 45      | 50          | 40          | 35          | 45          | 40          | 45          | 30      | 45          | 50          | 40          |      |
| 10      | without emotion names | 45      | 45      | 50        | 48,33333333 | 40      | 57,5        | 40          | 40          | 45          | 40          | 40          | 45      | 40          | 35          | 25          |      |
| 11      | without emotion names | 40      | 30      | 45        | 25          | 45      | 35          | 35          | 50          | 35          | 55          | 30          | 30      | 35          | 30          | 45          |      |
| 12      | without emotion names | 30      | 45      | 25        | 35          | 25      | 40          | 30          | 25          | 35          | 57,5        | 30          | 30      | 15          | 25          | 35          |      |
| 13      | without emotion names | 50      | 50      | 50        | 50          | 40      | 45          | 55          | 45          | 50          | 45          | 40          | 55      | 55          | 60          | 50          |      |
| 14      | without emotion names | 50      | 55      | 35        | 60          | 50      | 50          | 60          | 15          | 55          | 55          | 55          | 60      | 29,16666667 | 55          | 50          |      |
| 15      | without emotion names | 55      | 55      | 50        | 45          | 50      | 50          | 60          | 65          | 70          | 40          | 47,5        | 55      | 60          | 50          | 45          |      |
| 16      | without emotion names | 35      | 50      | 55        | 50          | 40      | 40          | 40          | 50          | 45          | 45          | 30          | 45      | 60          | 60          | 40          |      |
| 17      | without emotion names | 60      | 60      | 55        | 67,5        | 55      | 60          | 70          | 48,33333333 | 65          | 55          | 55          | 55      | 55          | 60          | 65          |      |
| 18      | without emotion names | 35      | 60      | 50        | 55          | 45      | 57,5        | 62,5        | 65,83333333 | 55          | 60          | 40          | 60      | 60          | 60          | 50          |      |
| 19      | without emotion names | 50      | 50      | 35        | 55          | 50      | 60          | 50          | 42,5        | 50          | 50          | 45          | 60      | 45          | 50          | 66,66666667 |      |
| 20      | without emotion names | 50      | 50      | 40        | 45          | 45      | 46,66666667 | 55          | 40          | 40          | 52,5        | 35          | 55      | 35          | 45          | 45          |      |
| 21      | without emotion names | 45      | 50      | 50        | 50          | 45      | 46,66666667 | 50          | 40          | 60          | 45          | 40          | 50      | 40          | 50          | 50          |      |
| 22      | without emotion names | 50      | 70      | 35        | 60          | 50      | 35          | 60          | 35          | 40          | 45          | 45          | 45      | 30          | 50          | 50          |      |
| 23      | without emotion names | 65      | 55      | 45        | 50          | 72,5    | 55          | 55          | 52,5        | 50          | 75          | 60          | 65      | 55          | 50          | 62,5        |      |
| 24      | without emotion names | 25      | 60      | 40        | 50          | 45      | 35          | 55          | 40          | 40          | 45          | 32,5        | 60      | 40          | 45          | 45          |      |
| 25      | with emotion names    | 35      | 15      | 20        | 40          | 30      | 35          | 25          | 10          | 40          | 30          | 40          | 25      | 30          | 40          | 40          |      |
| 26      | with emotion names    | 65      | 55      | 57,5      | 60          | 57,5    | 65          | 50          | 50          | 55          | 40          | 60          | 50      | 50          | 55          | 55          |      |
| 27      | with emotion names    | 35      | 55      | 45        | 37,5        | 25      | 30          | 50          | 40          | 30          | 40          | 30          | 50      | 45          | 31,66666667 | 30          |      |
| 28      | with emotion names    | 40      | 55      | 30        | 45          | 30      | 35          | 45          | 30          | 35          | 45          | 40          | 50      | 35          | 35          | 35          |      |
| 29      | with emotion names    | 40      | 35      | 30        | 40          | 22,5    | 25          | 35          | 20          | 35          | 10          | 30          | 35      | 20          | 35          | 45          |      |
| 30      | with emotion names    | 60      | 55      | 40        | 55          | 55      | 52,5        | 55          | 47,5        | 62,5        | 57,5        | 50          | 50      | 35          | 60          | 65          |      |
| 31      | with emotion names    | 40      | 40      | 45        | 30          | 45      | 40          | 40          | 50          | 30          | 50          | 40          | 40      | 50          | 47,5        | 45          |      |
| 32      | with emotion names    | 32,5    | 40      | 35        | 55          | 56,25   | 45          | 50          | 40          | 38,33333333 | 51,66666667 | 58,33333333 | 22,5    | 35          | 55          | 52,5        |      |
| 33      | with emotion names    | 40      | 40      | 55        | 35          | 30      | 45          | 40          | 40          | 35          | 37,5        | 35          | 35      | 45          | 40          | 35          |      |
| 34      | with emotion names    | 55      | 65      | 30        | 55          | 62,5    | 45          | 65          | 15          | 40          | 40          | 50          | 60      | 20          | 40          | 45          |      |
| 35      | with emotion names    | 45      | 50      | 30        | 30          | 30      | 35          | 45          | 25          | 25          | 45          | 40          | 50      | 30          | 35          | 30          |      |
| 36      | with emotion names    | 80      | 85      | 40        | 55          | 65      | 65          | 83,33333333 | 50          | 55          | 55          | 70          | 70      | 50          | 60          | 60          |      |
| 37      | with emotion names    | 55      | 45      | 40        | 45          | 25      | 45          | 45          | 32,5        | 45          | 35          | 55          | 35      | 40          | 35          | 25          |      |
| 38      | with emotion names    | 45      | 50      | 50        | 45          | 35      | 50          | 45          | 40          | 62,5        | 40          | 45          | 45      | 40          | 45          | 30          |      |
| 39      | with emotion names    | 50      | 45      | 35        | 40          | 50      | 40          | 50          | 40          | 40          | 35          | 40          | 45      | 35          | 35          | 40          |      |
| 40      | with emotion names    | 40      | 60      | 25        | 40          | 25      | 35          | 55          | 25          | 40          | 30          | 35          | 50      | 30          | 35          | 30          |      |
| 41      | with emotion names    | 40      | 30      | 17,5      | 10          | 27,5    | 40          | 40          | 15          | 10          | 40          | 35          | 35      | 25          | 10          | 45          |      |
| 42      | with emotion names    | 40      | 35      | 45        | 45          | 40      | 55          | 40          | 40          | 50          | 45          | 40          | 35      | 50          | 45          | 40          |      |
| 43      | with emotion names    | 45      | 40      | 40        | 45          | 15      | 50          | 40          | 40          | 50          | 40          | 40          | 40      | 35          | 50          | 20          |      |
| 44      | with emotion names    | 35      | 40      | 35        | 35          | 50      | 40          | 45          | 35          | 45          | 40          | 30          | 40      | 35          | 40          | 40          |      |
| 45      | with emotion names    | 35      | 30      | 30        | 20          | 35      | 42,5        | 30          | 25          | 25          | 35          | 30          | 25      | 25          | 30          | 30          |      |
| 46      | with emotion names    | 45      | 45      | 40        | 45          | 40      | 45          | 45          | 30          | 40          | 45          | 35          | 45      | 40          | 50          | 45          |      |
| 47      | with emotion names    | 40      | 55      | 50        | 45          | 62,5    | 40          | 45          | 45          | 45          | 70          | 50          | 50      | 55          | 45          | 55          |      |
| 48      | with emotion names    | 40      | 60      | 40        | 60          | 50      | 60          | 70          | 40          | 60          | 57,5        | 60          | 62,5    | 40          | 55          | 45          |      |
