# Supplementary material for: The Odor Context Facilitates the Perception of Low-Intensity Facial Expressions of Emotion
Source: PubMed Central journal article supplement (PMC4577100; doi:10.1371/journal.pone.0138656), 2015-09-21
Supplement: pone.0138656.s004.pdf [file pone.0138656.s004.pdf]

## Percentage of intrusions

| Subject | Group                 | no odor |         |           |      |         | pleasant |         |           |      |         | aversive |         |           |      |         |
|---------|-----------------------|---------|---------|-----------|------|---------|----------|---------|-----------|------|---------|----------|---------|-----------|------|---------|
|         |                       | anger   | disgust | happiness | fear | sadness | anger    | disgust | happiness | fear | sadness | anger    | disgust | happiness | fear | sadness |
| 1       | without emotion names | 0       | 0       | 0         | 0    | 0       | 0        | 0,05    | 0         | 0    | 0       | 0,05     | 0       | 0         | 0    | 0       |
| 2       | without emotion names | 0       | 0       | 0         | 0    | 0       | 0        | 0       | 0         | 0    | 0       | 0        | 0       | 0         | 0    | 0       |
| 3       | without emotion names | 0       | 0,15    | 0         | 0,05 | 0       | 0        | 0,2     | 0,05      | 0,15 | 0       | 0        | 0,3     | 0         | 0    | 0       |
| 4       | without emotion names | 0       | 0       | 0         | 0,05 | 0       | 0,05     | 0,1     | 0         | 0    | 0,05    | 0,1      | 0       | 0         | 0,05 | 0,05    |
| 5       | without emotion names | 0       | 0       | 0         | 0    | 0       | 0,05     | 0       | 0         | 0    | 0       | 0        | 0       | 0         | 0    | 0       |
| 6       | without emotion names | 0       | 0       | 0         | 0    | 0       | 0,05     | 0,05    | 0         | 0    | 0       | 0,05     | 0       | 0         | 0,1  | 0       |
| 7       | without emotion names | 0,05    | 0,05    | 0,05      | 0,25 | 0       | 0,05     | 0,05    | 0         | 0,2  | 0,2     | 0        | 0,05    | 0         | 0,1  | 0       |
| 8       | without emotion names | 0       | 0,1     | 0         | 0    | 0       | 0,05     | 0,15    | 0         | 0    | 0,05    | 0,05     | 0,1     | 0         | 0    | 0,1     |
| 9       | without emotion names | 0,05    | 0       | 0         | 0,05 | 0       | 0        | 0       | 0         | 0    | 0       | 0        | 0       | 0         | 0    | 0       |
| 10      | without emotion names | 0       | 0       | 0         | 0,1  | 0       | 0,15     | 0       | 0         | 0    | 0       | 0        | 0,05    | 0,05      | 0    | 0       |
| 11      | without emotion names | 0       | 0       | 0         | 0    | 0       | 0,05     | 0,05    | 0         | 0    | 0       | 0        | 0       | 0         | 0    | 0       |
| 12      | without emotion names | 0       | 0,1     | 0,05      | 0    | 0       | 0        | 0       | 0         | 0    | 0,05    | 0        | 0       | 0         | 0    | 0,05    |
| 13      | without emotion names | 0       | 0,05    | 0         | 0    | 0       | 0        | 0,1     | 0         | 0    | 0,05    | 0        | 0,1     | 0         | 0    | 0       |
| 14      | without emotion names | 0       | 0,05    | 0         | 0,15 | 0       | 0,1      | 0,2     | 0         | 0,25 | 0,15    | 0        | 0,15    | 0,05      | 0,15 | 0,05    |
| 15      | without emotion names | 0       | 0,25    | 0,05      | 0,05 | 0       | 0        | 0,25    | 0,15      | 0,2  | 0,05    | 0        | 0,15    | 0,1       | 0    | 0       |
| 16      | without emotion names | 0       | 0,2     | 0,15      | 0    | 0       | 0        | 0,1     | 0         | 0,05 | 0       | 0        | 0,05    | 0,2       | 0    | 0       |
| 17      | without emotion names | 0       | 0,15    | 0         | 0,05 | 0,05    | 0        | 0,25    | 0         | 0    | 0,05    | 0,05     | 0,1     | 0         | 0,05 | 0,1     |
| 18      | without emotion names | 0       | 0,25    | 0         | 0    | 0       | 0,1      | 0,1     | 0,1       | 0    | 0,2     | 0        | 0,1     | 0,05      | 0    | 0       |
| 19      | without emotion names | 0       | 0,1     | 0         | 0    | 0       | 0        | 0,15    | 0,05      | 0    | 0       | 0        | 0,2     | 0,05      | 0    | 0,05    |
| 20      | without emotion names | 0       | 0,05    | 0         | 0    | 0,05    | 0        | 0,1     | 0,05      | 0    | 0,1     | 0        | 0,15    | 0         | 0,05 | 0,1     |
| 21      | without emotion names | 0       | 0,1     | 0         | 0    | 0       | 0,05     | 0       | 0         | 0    | 0,2     | 0        | 0,05    | 0         | 0    | 0,05    |
| 22      | without emotion names | 0       | 0,3     | 0         | 0    | 0,05    | 0        | 0,2     | 0         | 0    | 0       | 0        | 0,1     | 0         | 0    | 0,05    |
| 23      | without emotion names | 0       | 0,1     | 0,05      | 0    | 0,1     | 0        | 0,15    | 0,15      | 0    | 0,2     | 0        | 0,2     | 0,1       | 0,05 | 0,05    |
| 24      | without emotion names | 0       | 0,25    | 0         | 0    | 0,2     | 0        | 0,15    | 0         | 0    | 0,15    | 0,05     | 0,3     | 0         | 0    | 0,25    |
| 25      | with emotion names    | 0,1     | 0       | 0         | 0,05 | 0,05    | 0        | 0,05    | 0         | 0,05 | 0       | 0,1      | 0       | 0         | 0    | 0       |
| 26      | with emotion names    | 0,05    | 0,05    | 0         | 0,05 | 0,1     | 0        | 0,05    | 0         | 0    | 0,05    | 0        | 0,05    | 0,05      | 0,05 | 0,1     |
| 27      | with emotion names    | 0,05    | 0,4     | 0,05      | 0    | 0       | 0,05     | 0,3     | 0,05      | 0    | 0       | 0,05     | 0,3     | 0,1       | 0,05 | 0       |
| 28      | with emotion names    | 0       | 0,2     | 0         | 0,05 | 0       | 0        | 0,1     | 0         | 0    | 0       | 0        | 0,15    | 0         | 0    | 0       |
| 29      | with emotion names    | 0       | 0,05    | 0         | 0,1  | 0       | 0        | 0,1     | 0         | 0    | 0       | 0        | 0,1     | 0         | 0,1  | 0,05    |
| 30      | with emotion names    | 0       | 0,1     | 0         | 0    | 0       | 0        | 0,15    | 0,05      | 0    | 0,05    | 0        | 0,05    | 0         | 0,05 | 0       |
| 31      | with emotion names    | 0       | 0       | 0         | 0    | 0,05    | 0        | 0,05    | 0         | 0    | 0,05    | 0,05     | 0,05    | 0         | 0    | 0       |
| 32      | with emotion names    | 0,15    | 0,8     | 0,15      | 0,3  | 0,5     | 0,2      | 0,65    | 0,25      | 0,25 | 0,35    | 0,3      | 0,85    | 0,15      | 0,35 | 0,35    |
| 33      | with emotion names    | 0       | 0       | 0         | 0    | 0       | 0        | 0       | 0         | 0    | 0       | 0        | 0       | 0         | 0    | 0       |
| 34      | with emotion names    | 0       | 0,45    | 0         | 0,05 | 0,05    | 0        | 0,45    | 0         | 0,05 | 0       | 0        | 0,4     | 0         | 0,05 | 0       |
| 35      | with emotion names    | 0,1     | 0,2     | 0,05      | 0    | 0       | 0,05     | 0,15    | 0         | 0    | 0       | 0,15     | 0,15    | 0,05      | 0,05 | 0       |
| 36      | with emotion names    | 0       | 0,45    | 0         | 0    | 0       | 0        | 0,45    | 0         | 0    | 0       | 0,05     | 0,35    | 0         | 0    | 0       |
| 37      | with emotion names    | 0       | 0       | 0         | 0    | 0       | 0        | 0,05    | 0         | 0    | 0       | 0        | 0       | 0         | 0    | 0,05    |
| 38      | with emotion names    | 0       | 0,05    | 0         | 0    | 0       | 0        | 0,05    | 0         | 0,05 | 0       | 0        | 0,05    | 0         | 0    | 0       |
| 39      | with emotion names    | 0       | 0,15    | 0         | 0    | 0       | 0        | 0,15    | 0         | 0    | 0       | 0        | 0,1     | 0         | 0    | 0       |
| 40      | with emotion names    | 0       | 0,3     | 0         | 0    | 0       | 0        | 0,3     | 0         | 0    | 0       | 0        | 0,15    | 0         | 0    | 0       |
| 41      | with emotion names    | 0       | 0       | 0,05      | 0    | 0       | 0        | 0,05    | 0         | 0    | 0       | 0,05     | 0,05    | 0         | 0    | 0,05    |
| 42      | with emotion names    | 0       | 0,1     | 0         | 0,1  | 0       | 0        | 0,1     | 0         | 0    | 0       | 0,05     | 0,05    | 0,05      | 0    | 0       |
| 43      | with emotion names    | 0,15    | 0,15    | 0,1       | 0,05 | 0       | 0,1      | 0,25    | 0,15      | 0,2  | 0,05    | 0,15     | 0,1     | 0,05      | 0,15 | 0       |
| 44      | with emotion names    | 0       | 0,05    | 0         | 0    | 0       | 0        | 0,1     | 0         | 0    | 0       | 0,05     | 0       | 0         | 0    | 0       |
| 45      | with emotion names    | 0       | 0       | 0         | 0    | 0       | 0,05     | 0       | 0         | 0    | 0       | 0        | 0       | 0         | 0    | 0       |
| 46      | with emotion names    | 0       | 0       | 0         | 0    | 0       | 0        | 0,05    | 0         | 0    | 0       | 0        | 0,05    | 0         | 0    | 0       |
| 47      | with emotion names    | 0       | 0,15    | 0         | 0    | 0,1     | 0        | 0,1     | 0         | 0    | 0       | 0        | 0,05    | 0         | 0    | 0       |
| 48      | with emotion names    | 0       | 0,15    | 0         | 0    | 0       | 0        | 0,25    | 0         | 0    | 0       | 0        | 0,15    | 0         | 0    | 0       |
