# Supplementary material for: The Odor Context Facilitates the Perception of Low-Intensity Facial Expressions of Emotion
Source: PubMed Central journal article supplement (PMC4577100; doi:10.1371/journal.pone.0138656), 2015-09-21
Supplement: pone.0138656.s005.pdf [file pone.0138656.s005.pdf]

**Percentage of times a given expression intruded**

| Subject | Group                 | no odor |         |           |        |         | pleasant |         |           |        |         | aversive |         |           |        |         |
|---------|-----------------------|---------|---------|-----------|--------|---------|----------|---------|-----------|--------|---------|----------|---------|-----------|--------|---------|
|         |                       | anger   | disgust | happiness | fear   | sadness | anger    | disgust | happiness | fear   | sadness | anger    | disgust | happiness | fear   | sadness |
| 1       | without emotion names | 0       | 0       | 0         | 0      | 0       | 0,0125   | 0       | 0         | 0      | 0       | 0,0125   | 0       | 0         | 0      | 0       |
| 2       | without emotion names | 0       | 0       | 0         | 0      | 0       | 0        | 0       | 0         | 0      | 0       | 0        | 0       | 0         | 0      | 0       |
| 3       | without emotion names | 0       | 0       | 0         | 0      | 0,05    | 0,05     | 0       | 0,025     | 0      | 0,025   | 0,0375   | 0       | 0,0125    | 0      | 0,025   |
| 4       | without emotion names | 0       | 0       | 0         | 0      | 0,0125  | 0        | 0,025   | 0         | 0      | 0,025   | 0        | 0,025   | 0         | 0,0125 | 0,0125  |
| 5       | without emotion names | 0       | 0       | 0         | 0      | 0       | 0        | 0,0125  | 0         | 0      | 0       | 0        | 0       | 0         | 0      | 0       |
| 6       | without emotion names | 0       | 0       | 0         | 0      | 0       | 0        | 0       | 0         | 0      | 0,025   | 0        | 0,025   | 0         | 0      | 0,0125  |
| 7       | without emotion names | 0       | 0       | 0,075     | 0,025  | 0       | 0,05     | 0,0125  | 0,05      | 0      | 0,0125  | 0,0125   | 0       | 0,025     | 0      | 0       |
| 8       | without emotion names | 0,025   | 0       | 0         | 0      | 0       | 0,0375   | 0,0125  | 0         | 0,0125 | 0       | 0,0375   | 0       | 0         | 0,0125 | 0,0125  |
| 9       | without emotion names | 0       | 0,0125  | 0,0125    | 0      | 0       | 0        | 0       | 0         | 0      | 0       | 0        | 0       | 0         | 0      | 0       |
| 10      | without emotion names | 0       | 0,0125  | 0,0125    | 0      | 0       | 0        | 0,025   | 0         | 0      | 0,0125  | 0,025    | 0       | 0         | 0      | 0       |
| 11      | without emotion names | 0       | 0       | 0         | 0      | 0       | 0        | 0       | 0,025     | 0      | 0       | 0        | 0       | 0         | 0      | 0       |
| 12      | without emotion names | 0       | 0       | 0,0125    | 0      | 0,025   | 0        | 0       | 0         | 0,0125 | 0       | 0        | 0       | 0,0125    | 0      | 0       |
| 13      | without emotion names | 0       | 0       | 0         | 0      | 0,0125  | 0,0125   | 0       | 0,025     | 0      | 0       | 0,0125   | 0       | 0         | 0,0125 | 0       |
| 14      | without emotion names | 0       | 0       | 0,0375    | 0      | 0,0125  | 0        | 0,0125  | 0,15      | 0      | 0,0125  | 0        | 0       | 0,075     | 0      | 0,025   |
| 15      | without emotion names | 0       | 0,0125  | 0,0375    | 0,025  | 0,0125  | 0,025    | 0,0125  | 0,1       | 0,025  | 0       | 0        | 0       | 0,0125    | 0,0375 | 0,0125  |
| 16      | without emotion names | 0       | 0       | 0,025     | 0,0625 | 0       | 0        | 0       | 0,0125    | 0,0125 | 0,0125  | 0        | 0       | 0         | 0,0625 | 0       |
| 17      | without emotion names | 0       | 0,0125  | 0,05      | 0      | 0       | 0,0375   | 0       | 0,0375    | 0      | 0       | 0,025    | 0,0125  | 0,0375    | 0      | 0       |
| 18      | without emotion names | 0       | 0       | 0,025     | 0      | 0,0375  | 0,025    | 0,05    | 0         | 0,0125 | 0,0375  | 0,0125   | 0,0125  | 0,0125    | 0      | 0       |
| 19      | without emotion names | 0       | 0       | 0         | 0      | 0,025   | 0        | 0       | 0         | 0,0125 | 0,0375  | 0        | 0,0125  | 0         | 0      | 0,0625  |
| 20      | without emotion names | 0,025   | 0       | 0         | 0      | 0       | 0,0125   | 0,025   | 0         | 0      | 0,025   | 0        | 0,025   | 0         | 0      | 0,05    |
| 21      | without emotion names | 0       | 0       | 0         | 0      | 0,025   | 0,025    | 0,025   | 0         | 0      | 0,0125  | 0        | 0,0125  | 0         | 0      | 0,0125  |
| 22      | without emotion names | 0       | 0       | 0         | 0,0125 | 0,075   | 0        | 0       | 0         | 0      | 0,05    | 0,0125   | 0       | 0         | 0      | 0,025   |
| 23      | without emotion names | 0,0125  | 0,0125  | 0         | 0,0125 | 0,025   | 0,025    | 0,0375  | 0         | 0,0125 | 0,05    | 0        | 0       | 0,0125    | 0,0125 | 0,075   |
| 24      | without emotion names | 0,0375  | 0       | 0         | 0,0125 | 0,0625  | 0,0375   | 0       | 0         | 0      | 0,0375  | 0,0875   | 0       | 0,0125    | 0      | 0,05    |
| 25      | with emotion names    | 0       | 0,0375  | 0         | 0,0125 | 0       | 0,0125   | 0       | 0         | 0      | 0,0125  | 0        | 0,025   | 0         | 0      | 0       |
| 26      | with emotion names    | 0,0375  | 0,0125  | 0,0125    | 0      | 0       | 0,0125   | 0       | 0,0125    | 0      | 0       | 0,025    | 0,0125  | 0,025     | 0      | 0       |
| 27      | with emotion names    | 0       | 0       | 0         | 0      | 0,125   | 0        | 0       | 0         | 0      | 0,1     | 0        | 0       | 0         | 0      | 0,125   |
| 28      | with emotion names    | 0       | 0       | 0,0125    | 0      | 0,05    | 0        | 0       | 0,0125    | 0      | 0,0125  | 0        | 0       | 0         | 0      | 0,0375  |
| 29      | with emotion names    | 0       | 0,0125  | 0         | 0,0125 | 0,0125  | 0        | 0       | 0         | 0,0125 | 0,0125  | 0        | 0,0125  | 0,0125    | 0,0125 | 0,025   |
| 30      | with emotion names    | 0       | 0       | 0,0125    | 0,0125 | 0       | 0        | 0       | 0,0375    | 0,025  | 0       | 0        | 0       | 0,025     | 0      | 0       |
| 31      | with emotion names    | 0       | 0,0125  | 0         | 0      | 0       | 0        | 0,0125  | 0         | 0      | 0,0125  | 0        | 0       | 0         | 0      | 0,025   |
| 32      | with emotion names    | 0,05    | 0,1625  | 0,0125    | 0,0375 | 0,2125  | 0,05     | 0,075   | 0,0375    | 0,0375 | 0,225   | 0,0625   | 0,1125  | 0,0125    | 0,05   | 0,2625  |
| 33      | with emotion names    | 0       | 0       | 0         | 0      | 0       | 0        | 0       | 0         | 0      | 0       | 0        | 0       | 0         | 0      | 0       |
| 34      | with emotion names    | 0,0125  | 0,0125  | 0,1125    | 0      | 0       | 0,0125   | 0       | 0,1125    | 0      | 0       | 0        | 0       | 0,1125    | 0      | 0       |
| 35      | with emotion names    | 0       | 0       | 0         | 0      | 0,0875  | 0        | 0       | 0         | 0      | 0,05    | 0        | 0       | 0         | 0,0125 | 0,0875  |
| 36      | with emotion names    | 0       | 0       | 0         | 0      | 0,1125  | 0        | 0       | 0         | 0      | 0,1125  | 0        | 0       | 0         | 0      | 0,1     |
| 37      | with emotion names    | 0       | 0       | 0         | 0      | 0       | 0,0125   | 0       | 0         | 0      | 0       | 0        | 0       | 0,0125    | 0      | 0       |
| 38      | with emotion names    | 0       | 0       | 0,0125    | 0      | 0       | 0        | 0       | 0,025     | 0      | 0       | 0        | 0       | 0,0125    | 0      | 0       |
| 39      | with emotion names    | 0       | 0       | 0         | 0      | 0,0375  | 0,0125   | 0       | 0         | 0      | 0,025   | 0        | 0       | 0         | 0      | 0,025   |
| 40      | with emotion names    | 0       | 0       | 0,0125    | 0      | 0,0625  | 0        | 0       | 0,025     | 0      | 0,05    | 0        | 0       | 0,0125    | 0      | 0,025   |
| 41      | with emotion names    | 0       | 0       | 0         | 0,0125 | 0       | 0        | 0       | 0         | 0,0125 | 0       | 0        | 0       | 0,0125    | 0,025  | 0       |
| 42      | with emotion names    | 0       | 0,0125  | 0,025     | 0      | 0,0125  | 0        | 0       | 0,025     | 0      | 0       | 0        | 0,0125  | 0,0125    | 0,0125 | 0       |
| 43      | with emotion names    | 0       | 0       | 0         | 0      | 0,1125  | 0        | 0       | 0,0125    | 0,0125 | 0,1625  | 0,0125   | 0       | 0,0125    | 0      | 0,0875  |
| 44      | with emotion names    | 0       | 0       | 0,0125    | 0      | 0       | 0        | 0       | 0,0125    | 0      | 0,0125  | 0        | 0       | 0         | 0,0125 | 0       |
| 45      | with emotion names    | 0       | 0       | 0         | 0      | 0       | 0        | 0       | 0         | 0      | 0,0125  | 0        | 0       | 0         | 0      | 0       |
| 46      | with emotion names    | 0       | 0       | 0         | 0      | 0       | 0        | 0       | 0,0125    | 0      | 0       | 0        | 0       | 0,0125    | 0      | 0       |
| 47      | with emotion names    | 0       | 0,025   | 0         | 0      | 0,0375  | 0        | 0       | 0         | 0      | 0,025   | 0        | 0       | 0         | 0      | 0,0125  |
| 48      | with emotion names    | 0       | 0       | 0,0125    | 0      | 0,025   | 0        | 0       | 0,025     | 0      | 0,0375  | 0        | 0       | 0         | 0      | 0,0375  |
